# Supplementary material for: Extracellular vesicles are dynamic regulators of maternal glucose homeostasis during pregnancy
Source: Springer Nature journal article supplement (doi:10.1038/s41598-023-31425-x), 2023-03-20
Supplement: MOESM1 [file 41598_2023_31425_MOESM1_ESM.pdf]

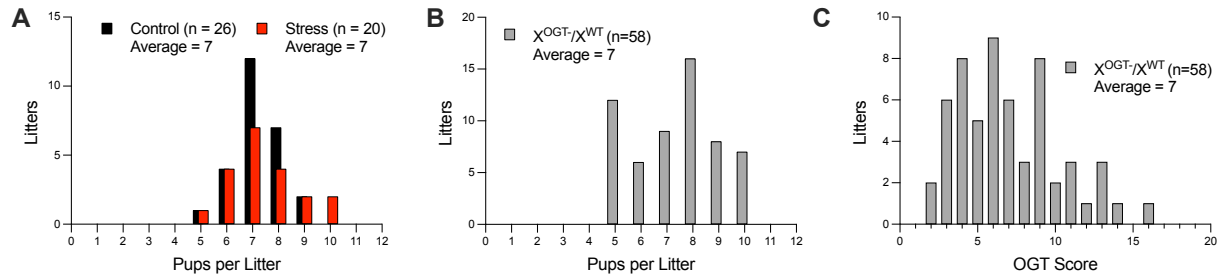

**Supplementary Figure 1: Litter size is not affected by stress or genotype. (A)** Control litters (black bars, n=26) had an average of 7 pups per litter. Stress litters (red bars, n=20) had an average of 7 pups per litter. **(B)** Litters from  $X^{OGT-}/X^{WT}$  dams (n=58) had an average of 7 pups per litter. **(C)** The average OGT score for litters from  $X^{OGT-}/X^{WT}$  was 7.

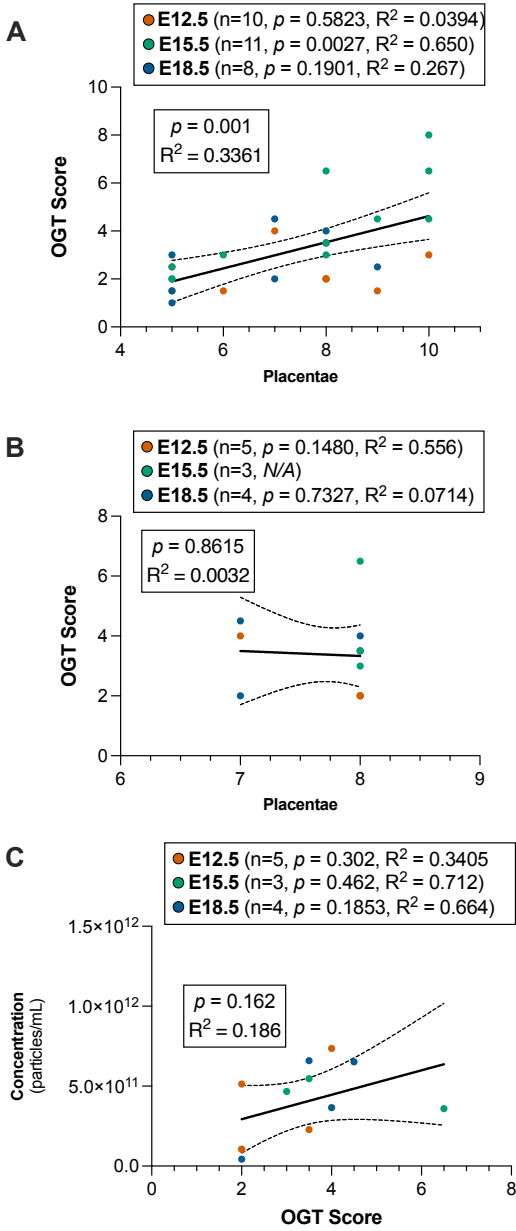

**Supplementary Figure 2: OGT score affects EVs, independent of number of placentae.** We sought to explore the relationship between OGT score and number of placentae. **(A)** The number of placentae is significantly correlated to the OGT score (Pearson correlation,  $F_{1,27}=13.67$ ,  $p = 0.001$ ,  $R^2 = 0.3361$ ). This is not surprising, as more placentae increase the possibility for more copies of OGT. Note that there are three identical datapoints for E12.5, with 8 placentae resulting in an OGT score of 2, an identical data point for E12.5 and E18.5 with 5 placentae resulting in an OGT score of 1.5, a second identical data point for E12.5 and E18.5 with 8 placentae resulting in an OGT score of 3.5, and two identical datapoints for E15.5 with 5 placentae resulting in an OGT score of 2. **(B)** Including only litters of 7-8 pups, we see that the OGT score ranges from 2-7 (Pearson correlation,  $F_{1,10}=0.032$ ,  $p = 0.8615$ ,  $R^2 = 0.0032$ ). Note that there are three identical data points for E12.5 with 8 placentae resulting in an OGT score of 2, and an identical data point for E12.5 and E18.5 with 8 placentae resulting in an OGT score of 3.5. **(C)** Including only litters of 7-8 pups, we see a positive correlation between OGT score and concentration of particles in circulation (Pearson correlation,  $F_{1,10}=2.279$ ,  $p = 0.162$ ,  $R^2 = 0.1856$ ). Note that there is a nearly identical data point for E12.5, where an OGT score of 2 resulted in an EV concentration of  $1.04 \times 10^{11}$  and  $1.05 \times 10^{11}$ . 95% CI are shown as dotted lines above and below the trend line for **(A,B,C)**.

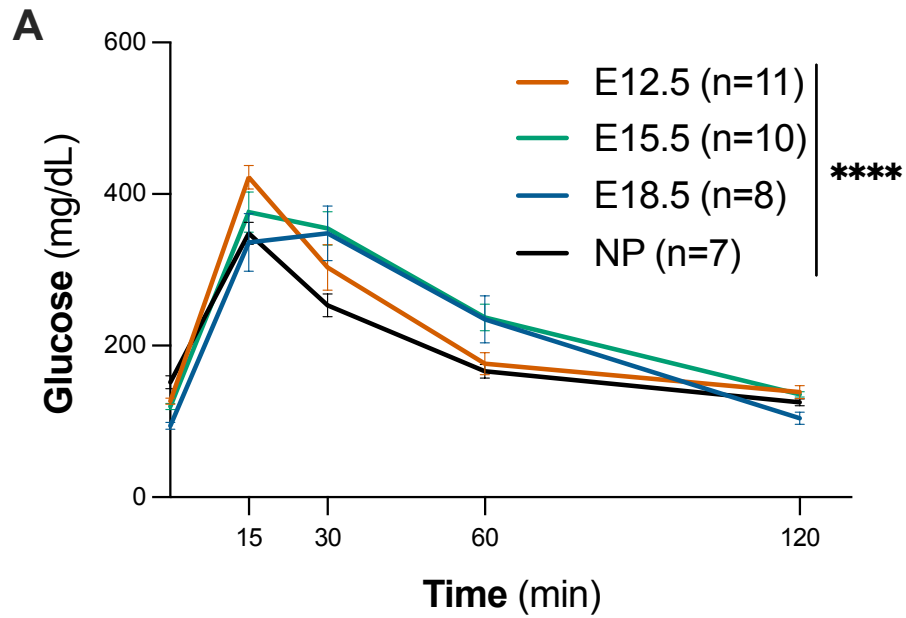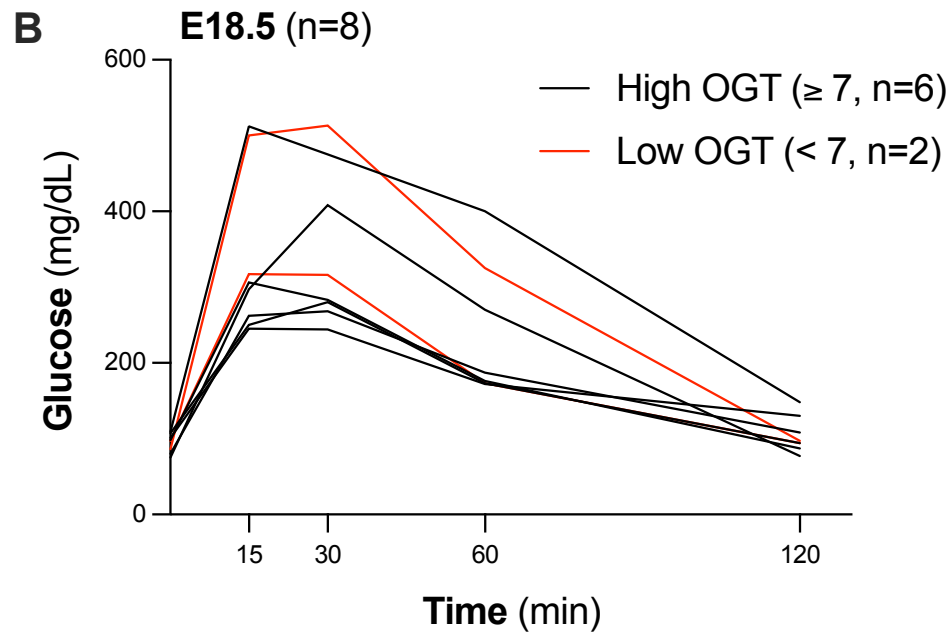

**Supplementary Figure 3: OGT in the placenta correlates with maternal glucose sensitivity.** (A) Glucose tolerance for non-pregnant (n=7, NP, black), E12.5 (n=11, orange), E15.5 (n=10, green), and E18.5 (n=8, blue) dams. Non-pregnant, E12.5, and E15.5 curves are repeated from Figure 4D, where we observed significant variation in glucose sensitivity across gestational days (two-way ANOVA, main effect of time,  $F_{2,078, 66.49}=210.2$ ,  $p < 0.0001$ , main effect of group,  $F_{3,32}=1.116$ ,  $p = 0.3571$ , time\*group interaction,  $F_{12,128}=4.887$ ,  $p < 0.0001$ ). (B) Glucose tolerance for individual dams on E18.5 broken up by OGT score, where low was considered  $< 7$  (n=2, red lines), and high  $\geq 7$  (n=6, black lines).
